# Supplementary material for: M6A-mediated upregulation of LINC00958 increases lipogenesis and acts as a nanotherapeutic target in hepatocellular carcinoma
Source: J Hematol Oncol. 2020 Jan 8;13:5. doi: 10.1186/s13045-019-0839-x (PMC6951025; doi:10.1186/s13045-019-0839-x)
Supplement: Supplementary file 3 — Table S1. The correlation between clinicopathological characteristics and LINC00958 expression level in 80 hepatocellular carcinoma patients. [file 13045_2019_839_MOESM3_ESM.xlsx]

## Sheet: Legend
Additional file 8: Supplementary Material 2.
Targets of miR-3619-5p predicted by PicTar, TargetScan, miRDB, and RNA22.

## Sheet: PicTar
HDGF
SLC12A4
PPME1
BTBD1
KPNA4
TET3
PLXNA2
ITCH
ME2
USP42
CMTM4
NPTN
ZHX3
GNAI2
ATP2B4
TNPO1
LMO4
CRKL
HIPK1
ARPC5L
OTUD4
KLC2
ANKRD40
ST5
TOMM22
PNPLA6
TMEM33
NAPB
PPPDE2
BTAF1
ATP2A2
CREB1
HDLBP
MAPK1
RAB4B
BCL2L11
EIF2C1
SPCS2
NAGPA
SLC6A9
RIMS4
PLS3
VAMP1
SMG7
MRC2
GCC2
VASP
NOMO3
ZBTB38
YWHAB
DMXL2
DNAJB6
DLL1
ALKBH6
FCHO1
RBM25
EXOC5
NRIP1
KPNA1
ZBTB39
ACSL1
TLE3
HS3ST5
PIK3CB
CADM1
BNC2
SLC9A3R2
PTER
PTDSS1
CENPO
TANC2
PARD6G
GATAD2B
SRSF1
TRIM44
PURB
CHPF
CELF1
TRAF3
ABHD2
CALM1
SHOC2
IPO7
RAPGEFL1
CPD
YPEL2
IRS1
NOMO1
PHF6
TMEM97
C11orf10
MIER3
GALNT7
PCNX
FGFR1
TMEM189-UBE2V1
THRAP3
SDAD1
NDOR1
CREBZF
TBL1XR1
EMILIN3
TFAP2C
UBE2Z
BACE1
TAB3
NAA15
ING1
TLE4
RC3H1
SMARCC1
CNOT2
CISD3
SP1
RANBP3
TGIF2
FAM53C
NUFIP2
RAB35
ZFAND3
CDS2
COL12A1
REEP1
ERLIN2
USP46
PEG10
FIGN
KIAA0226
TYRO3
NSD1
RTF1
RGPD6
SLC25A25
TMEM48
MYEF2
YWHAZ
BCL2L2
SCARB1
TGOLN2
CREB5
NRXN3
SAMD4A
SEC24C
CELF2
TAOK1
QKI
ZFAND6
PCDH19
CDK6
PPARGC1A
2019-03-06
CLASP1
GSK3B
CD47
C7orf42
THY1
SETD8
BAZ2A
TRIM33
DOCK9
VTI1A
CPSF4
ATXN7L1
PAFAH1B2
HMGN3
TMEM194A
ZNF710
MB21D2
JMJD8
SETD5
PPP6C
CHMP4B
ATXN1L
MYO1C
HOMER1
PTPRJ
DEK
POLR2F
SPTBN2
CBL
PPP1R12A
MARK2
RGMA
CSF1
ANKRD52
DOK4
TIMP2
AHDC1
PHKG2
LAMP2
IGDCC3
PAFAH1B1
LRRC14
WIBG
MMS19
CDC42SE1
JPH1
SOS2
C1orf151-NBL1
HMG20A
PPTC7
RGPD4
PCDH7
ZMYM2
CALU
KCNC4
RGPD8
RASSF5
PSIP1
RFX7
GRAMD3
STAG2
GNAL
FAIM3
LRP1B
LUZP1
NCKIPSD
IP6K1
GLYCTK
RAB14
RNF44
NRP1
C16orf52
KIAA0247
ESRRA
ARF5
PTHLH
TXLNG
GRINA
MINK1
SNX18
CDIPT
TRIP10
EZH1
REPIN1
LARP1
SNX12
NOMO2
TNFAIP3
POU2F1
ITGB8
RBPMS
WDR82
PHC2
ESPN
RAB5B
TBC1D10B
HNRNPUL2
PROSER1
ARHGEF12
CAMK2D
ARMC5
PPM1H
BCL11B
CNTFR
PHF15
MAMSTR
USP3
PIM1
FAM84B
PDRG1
VASN
CELSR2
TAF15
PARP16
ARID1A
DOLPP1
SEPSECS
FZD7
MED19
BCL11A
CAMTA1
EIF4G1
WDR33
MLLT10
NRARP
ZFHX3
PHLPP2
ROR1
TWF1
SMYD5
ZNF609
SLC16A3
TBC1D24
AMMECR1L
2019-09-03
PRPF4B
LOC100507421
MLL2
TRPS1
PICK1
UBAP2L
STX6
OXR1
FBXL18
KIAA1522
ADSS
CPEB4
TRA2B
PGRMC2
PLAGL2
BCL9L
SOCS7
HOXD4
FOXP2
GFRA1
NAA30
UHMK1
KDM2A
MAPK1IP1L
PRR14L
UGGT1
ARL8B
CDK16
UBE2R2
SIGMAR1
PAPPA
GALNT1
PELI3
CAPZA1
WDTC1
UBE4A
LY6E
RALGAPB
ARL2
NMB
PANK1
MECOM
PAPD5
DAGLA
ZBTB41

## Sheet: TargetScan
HDGF
PPME1
MEAF6
KPNA4
TET3
ITCH
NAA50
ACLY
KLHDC10
POU4F1
TNPO1
UBE2H
LRP2
CRKL
SLC6A6
ARPC5L
RUNX1
ANKRD6
PLEKHG3
AKAP12
KLC2
ANKRD40
TOMM22
PNPLA6
TMEM33
PPPDE2
BTAF1
ATP2A2
DMWD
IRS2
IPO9
HDLBP
RAB4B
BCL2L11
INTS2
EIF2C1
PIP4K2B
ASXL2
GCC2
EDF1
NOMO3
KLHDC3
DMXL2
PPP2R1A
AFMID
CD276
DLL1
RAP2B
APH1A
ZNF395
EXOC5
ERC1
KPNA1
ZBTB39
CPA4
TLE3
PPAP2B
CADM1
SLC9A3R2
PTER
TMEM135
GATAD2B
AP1S3
SRSF1
POLR3A
PURB
CHPF
CELF1
ATP8B2
SHOC2
TXLNA
CPD
IRS1
NOMO1
PHF6
PARD6B
TMEM97
GALNT7
HIF1AN
THRAP3
NIPSNAP1
SDAD1
CCNT2
RNF8
NDOR1
TBL1XR1
NAA15
TLE4
SMARCC1
DIAPH1
C19orf56
TMED9
CHD2
TGIF2
FBXO32
FAM53C
NUFIP2
RAB35
GIGYF2
ZFAND3
CDS2
ERLIN2
PEG10
EFHD1
FIGN
MAPRE1
MTPN
NSD1
UBE2O
SORL1
RTF1
FBLN5
TMEM48
BCL2L2
NCKAP5L
SCARB1
TGOLN2
MAST4
ATG14
SAMD4A
SEC24C
C13orf23
TAOK1
QKI
CTNNBIP1
UCP2
CDK6
2019-03-06
GSK3B
CD47
C7orf42
PRKAR1A
HSPA12A
BAZ2A
DCAF10
DOCK9
CPSF4
HMGA1
HS2ST1
PAFAH1B2
HMGN3
PPP6C
C20orf4
DEK
DBNDD2
ASXL1
USP20
SPTBN2
PKD1
TNFAIP8
PPP1R12A
MARK2
AKAP13
CSF1
ANKRD52
TIMP2
SOX12
LRP8
TMEM161B
ATP2C1
LDOC1L
SNCA
FAT4
C6orf192
CBX5
HMG20A
VPS53
PTGS2
SARM1
CALU
FAM102A
NBR1
KCNK3
RASSF5
AHCYL1
PSIP1
RPS6KA3
RFX7
MITF
STAG2
LRP1B
GLG1
LUZP1
NCKIPSD
PPP2CB
USP24
ATRX
RAB14
CHAC1
FAM123B
RNF44
C9orf78
SPIRE1
MINK1
NOTCH2
TRIP10
EZH1
KIF1B
LARP1
NOMO2
TNFAIP3
ZNF687
FBXO44
PCGF3
ITGB8
ARID3B
SYS1
WDR82
ZNF512B
ACOX1
RAB5B
SLC12A9
TBC1D10B
HNRNPUL2
ARHGEF12
BCL11B
PHLDA3
NMT1
RAB6A
FOSB
PIM1
PDRG1
TAF15
CTNNB1
BMP2
DOLPP1
INCENP
MED19
BCL11A
MLLT10
NRARP
ZFHX3
KIAA0284
PHLPP2
TLK1
TWF1
SMYD5
ZNF609
MLL2
TRPS1
UBAP2L
STX6
CPEB4
ZNF217
TRA2B
TPP1
PLAGL2
NSUN4
CTBP1
SPATS2L
FOXP2
CD320
UHMK1
VRK3
MAPK1IP1L
TATDN2
PRR14L
UBE2R2
PAPPA
SMG5
MFN2
LIMK2
WDTC1
UBE4A
IP6K2
LY6E
ABI2
ARL2
PFKFB4
PLD2
PANK1
MECOM
MFSD6
RAPGEF1
ARL8A
CAPRIN1

## Sheet: miRDB
HDGF
LSM12
RC3H1
MED19
MFN2
NAA15
AMMECR1L
ZFAND3
MAPK1
NEO1
DOLPP1
GSK3B
CBL
SEC24C
DMXL2
C17orf49
PIM1
AKAP13
HPSE2
BAZ2A
TRA2B
PROX1
FBXO32
PGF
ATP2A3
SNX12
VPS53
JPH1
IRS1
DLL1
MLLT10
KCNC2
EXOC3L2
RUBCN
CPSF4
HR
COP1
SLC8A1
MLXIP
PYM1
BTBD1
CTSS
ZBTB20
PLAGL2
FGF14
RBM34
FNDC5
USP20
TBL1XR1
ZBTB39
LRP2
MTA3
IPO7
NFATC2
QKI
TNPO1
OPRK1
SLC23A2
LHX6
IL17RD
FAM19A4
PRR14L
RALGAPB
F8
PIK3CB
RPUSD1
BCL2L11
PPP6C
FGFR1
DAGLA
RAPGEFL1
KBTBD2
KIAA0355
MMS19
PRR23B
RAB14
SARM1
USP46
CXXC5
PGGT1B
GPN1
ATP8A1
UBL4B
CBR4
PPM1L
NAA50
BTAF1
KIF13A
SLC36A1
ACSL1
BCL11A
IKBKB
ERFE
RGS22
MEAF6
DHRS12
MPI
SEC31A
ZNF609
TGOLN2
SLC25A39
SMYD5
PURB
SLC25A25
NUFIP2
TMEM248
FBLN5
GPR6
JAKMIP2
GPR85
CPEB4
LUZP1
HMGN4
RAB4B
GCC2
TANC2
RCSD1
STK32B
NFIA
USP24
ZNF710
TMEM86A
PDE5A
C1orf226
PTER
PCDH20
GLOD5
ZFHX3
KSR1
SOGA1
ARHGAP26
IGSF3
PDLIM5
INO80C
HMG20A
USP3
ATP8B2
TMEM33
MTMR3
CPEB1
COG5
TAOK1
MAP3K4
PAN2
UBE4A
EXOC2
CLASP1
KIF21B
PLXDC1
ACVRL1
TRAF1
EDF1
MOBP
CREBL2
CMTM4
DBNDD1
BAX
RNF169
DUSP15
CAPN11
CHD2
GATD3A
ATG16L1
FAM110D
NSD1
GFRA1
IPO11
NEURL1B
CNIH1
UBE2R2
ADSS
OXR1
SPTBN2
SNX8
TGIF2
GNAL
ST6GALNAC1
GALNT7
ITGB8
ERRFI1
CBX2
TMEM43
PHF6
VSTM4
TSPAN11
MAPK8
TMEM161B
SIGMAR1
RIMS3
FAM20B
HMGN3
PDE11A
KMT5A
WDTC1
KCNC4
PCLO
DBNDD2
DAPK2
CSF1
HSD17B8
PCMT1
NOMO3
MAK16
PARP16
GDNF
COL4A3BP
SOS2
PID1
ALPK2
KCNH8
VANGL2
KRTAP4-4
MYO1D
PLA2G3
CCDC103
SCAMP4
PHACTR3
KIF7
MECOM
SOX8
CTNNB1
RAP1GAP2
LARP1
CRKL
ZBTB10
MBLAC2
BRPF3
ARL2
CEP44
ALS2
CELF1
TFAP2C
ATP6V0E2
NMB
GALNT18
SLC13A3
CLSTN1
ERC1
SLC25A42
DPP8
USP30
PHF20L1
ZNF214
KRTAP10-4
PPP2CB
ARID3B
PRRC2B
RBM20
PRICKLE2
LTF
PHF21A
SYT15
RPIA
ZNF641
UHMK1
KPNA1
TRAF3
PELI3
SPPL3
TRABD2B
ARF4
SDAD1
UTS2B
SMARCC1
FAM135B
NPTXR
TUT4
TWF1
SIK2
NECTIN1
DFFB
RHPN1
MTM1
KRTAP2-2
HIP1
CHMP4B
MFAP4
YWHAZ
SORBS1
TRIM33
CENPM
AP1G1
RIPOR2
MAMSTR
TMEM19
HNRNPU
PALM2
EGFLAM
NECAB3
LFNG
CDC37L1
UNC13C
VAV2
TFAP2D
COL4A5
CREB1
TENT4B
UGGT1
ADORA2A
SOCS2
HSPA12A
IQSEC3
CHFR
PROSER1
ALDH1B1
C3orf18
ZIC1
CNOT9
KRTAP10-11
MYO18A
TMED1
PWWP2A
TRIM66
LPGAT1
SPEN
RAB15
FSD2
IRS2
SIT1
SPINK2
UCHL1
ANKRD33B
TBC1D10B
WWOX
LIMK2
FLOT2
CD84
CDK5R1
TUBGCP2
TSC22D1
DERA
HSPA4L
HDLBP
RNF150
BNIP3
SAR1A
MFSD6L
REEP4
TAB3
ASXL1
FIBCD1
HTT
RETREG2
ZBTB9
POTEM
RFX7
TMED5
ZNF395
CPA4
KDM2A
MIEF1
AMER1
NAA30
DIAPH1
PRDM5
CTNNA1
LRP1B
THAP11
VASP
ZNFX1
SLC1A4
PFKFB4
ZNF341
JMJD4
WDR86
NADK
LDOC1
SIGLEC6
SCOC
2019-03-06
TLK1
SCP2
THSD7A
SETDB2
ESPNL
RNF180
LEPROTL1
ARHGAP18
TRAF5
MMP24
AHCYL1
THRAP3
NPTN
HDAC9
TXN2
SLC27A1
CPNE4
VASH1
FAM155A
CACFD1
CDR2L
C16orf72
SLC6A13
PDRG1
2019-09-04
CAMTA1
ASTN1
RPTOR
CDC42BPB
LURAP1
PAFAH1B1
RSAD1
DPYSL5
PRR15L
SCN3A
GOSR2
TGFBRAP1
RAB39B
SEMA5A
MAP6
SULF1
DOK2
KIAA0930
LOC102724951
RASEF
GINS3
DMWD
ABHD2
CLDN23
QSOX2
RIMBP2
BCL9L
GATAD1
RGPD6
ZKSCAN3
ZFP41
LOC102723360
LOC102724219
SSH1
ARVCF
EZH1
BACE2
ZNF33B
ATP2A2
POLR3G
VDR
DHRS4L1
LOC102724843
ALDH3A1
SP7
DOCK9
TET3
NYAP2
MAPK1IP1L
SMOC1
SYNCRIP
RFESD
GRAPL
TMEM132E
TMEM127
DCAF10
GRB10
SPDYE3
PAK3
WNT3
GPA33
DNM1
BTRC
UBE2H
SGCA
SLC22A23
TLE3
SYS1
CDC23
DIDO1
BANP
FIGN
INVS
PPARGC1A
TOLLIP
CAND1
SIK1
ATP2B4
PGRMC2
CDK6
KCNAB2
DLGAP1
SIK1B
IZUMO2
CAMK2A
CDC42SE1
EPS8L2
PRDM16
ZCWPW2
CD276
ARHGEF12
LAIR1
ATXN7L3
ABL2
SLC6A12
MAPRE1
HPS4
SVOP
FAT4
MIPOL1
GPD1
RNF115
CNTN2
WNT7A
MITF
PPP1R8
NAP1L4
AEBP1
COL6A3
RPL13
CECR2
GPATCH1
RUNX3
SLC22A11
RPH3A
BTBD11
TTC39B
SORCS1
DIO3
DCUN1D3
CNTNAP1
FAM49B
SUSD6
TBC1D19
CARTPT
SRGAP1
KCNJ13
PLXDC2
MED10
PTPN4
TSKU
BMP8A
PDP2
ARHGAP6
CALU
PPTC7
CYLD
PTPRD
FAM133B
TBC1D16
NOS3
MTF1
PNPLA6
VASN
KCNQ2
SLC25A44
VWA2
ZSWIM5
SKI
HECW1
MINK1
ERG28
RPL37
BCL11B
CDIP1
CNTNAP3
PPM1H
C6orf222
KIF16B
PTPN14
UAP1L1
PTAFR
MEF2C
TSNARE1
RNF2
PNPLA7
GSTZ1
MARVELD1
SOCS7
SMARCD1
COLQ
TEX2
FAM53C
RNFT2
ARHGAP17
ZNF264
RGMA
LPP
FAM156A
CDH8
C9orf3
FAM156B
CTDSP1
CCND2
GGT6
NCOA4
RELN
ESYT2
NDOR1
MRPS25
PARD6G
MTMR4
PANK1
CTBP1
KANSL3
ESRRG
SCN5A
KCNQ3
S1PR3
ICOSLG
TRAPPC3
GJA1
CCDC141
PSD4
NSUN4
SLC9A3R2
FAF2
MYRIP
TOMM22
RNF216
ARHGEF3
CDC14A
COA7
AREL1
LMX1B
PER1
PPIL2
ZNF346
CLIC5
FBP1
TTYH3
NTN1
NDC1
FUT3
ACVR1B
MBTD1
PLD2
UNC5C
PRKAR2A
MAK
UBALD2
CCDC198
CD247
SLC9A1
C17orf77
CTNNA3
UGGT2
PARP15
EEF1A1
IL2RB
TPR
EXOC6B
ACOX1
PPM1A
PVRIG
SLC31A1
ATP6V1C1
TRIM59
NHSL1
RECQL5
SLC7A6OS
TPPP
SEMA3D
HTR3E
FEM1A
ANKRD40
SEMA4D
PANK3
SCN1A
PDE4A
CDK13
TRDMT1
SPPL2B
SUPT6H
NRL
MBNL1
XRN1
RAB1B
PTEN
CHRNA4
FAM102A
C10orf90
SLC43A2
MECP2
ARHGAP35
NUAK2
ADRA1D
MVB12B
SLIT1
NSFL1C
NDUFAF3
KRTAP9-3
STAG2
SRRM3
DHRS4L2
SLC39A3
MPIG6B
DGKG
TMEM135
UBE2V1
AHNAK2
ADGRF2
ATXN1L
RRP7A
PPP1R12B
MTCL1
CEP85
DCUN1D4
EFR3B
GABARAP
TMEM189-UBE2V1
PFAS
LGSN
SRM
GPR162
FOXRED2
JAG2
PITPNM2
NMT1
CCDC42
STUM
SRRM4
TNFSF10
TRAF7
B3GALT5
LPIN2
COG2
RNF8
PDPK1
SCN2A
MARK4
TRPS1
CCDC149
NLRP2B
NOTCH2
TUBB8
MTPN
GYPC
UBAP2L
ANKRD60
CHPF
GPD1L
CASKIN1
CELF2
VIRMA
NDUFC2
ARHGAP31
PSMD10
DHX34
TBC1D24
KLLN
AGO1
SAMD4A
CRIP2
SHISAL1
ITIH1
CKB
PITHD1
LIFR
TDRD1
ZGLP1
TMEM225
ABLIM1
MED15
ADGB
YBEY
COL8A2
DOCK8
CHRNA10
PANK2
PLXNB1
MAPK13
CALM1
MUC3A
PGPEP1
MIEF2
SPNS2
PTPRJ
CHAC1
ARMH3
PDXK
MTMR12
RNF214
GPX4
LRTM2
AFMID
HOXA4
SEMA4F
RNF212B
ZNF12
STX1B
MAP9
PLS3
NCKIPSD
WDR83OS
SNTB2
YKT6
ARHGAP10
PYGB
KIAA0513
KRTAP1-5
PLXNA2
FBXL20
ASF1B
CCDC90B
PLD5
GIT2
ARMC5
CLRN1
TBC1D5
LPCAT1
HOPX
CAPN5
KIF1B
DNAJC5
SLC13A1
NEK6
MFSD6
NAA60
RTF1
NCS1
APOBEC2
STX17

## Sheet: RNA22
HDGF
ERG28
KLLN
ARHGDIG
SRCAP
SF3B3
SIGLEC11
HNF4A
MZB1
RPS6KA3
TMEM52
CASZ1
UBR4
EIF4G3
SLC9A1
ADGRB2
TRIM62
STK40
LRRC41
AMIGO1
ZNF697
NOTCH2
ENSA
SCAMP3
KHDC4
SMG5
COPA
ADAMTS4
PHLDA3
ACBD3
FH
SPEN
PQLC2
RPS6KA1
GPR3
PHACTR4
RCC1
ZMYM4
SMAP2
ATP6V0B
LRRC8D
SETDB1
UBAP2L
ATP8B2
CADM3
C1orf112
TMEM183A
ATP2B4
ZC3H11A
ZBED6
SERTAD4
MIA3
SNAP47
NUDT5
SVIL
CCDC6
PBLD
MICU1
CYP2C8
MMS19
BLOC1S2
C10orf76
GFRA1
FAM208B
RET
CCAR1
CYP2C18
AL583836.1
UBTD1
LZTS2
VTI1A
HABP2
DUSP8
CD59
AL049629.2
NUP160
MAP4K2
FAM168A
MAML2
NECTIN1
ROBO4
DNHD1
DGKZ
SDHAF2
AP003108.2
MYRF
VPS51
PCNX3
SF3B2
CNIH2
RBM4
RBM14-RBM4
USP35
TIRAP
TMEM45B
ADCY6
KRT8
SMARCC2
CTDSP2
DUSP6
ATP2B1
SSH1
GPN3
DDX54
VSIG10
CLSTN3
GPRC5A
DDX11
CACNB3
TUBA1C
OS9
SRGAP1
RAB3IP
MVK
TCHP
SETD1B
HIP1R
UBAC2
ATP11A
CHAMP1
RAB15
PIGH
CLMN
SYNE3
IGHA1
PCK2
RBM25
TRAF3
KLC1
CRIP1
AL928654.3
TMEM121
ARPP19
MAN2C1
BTBD1
PML
MPI
C15orf39
PSMA4
AKAP13
ABHD2
TRAP1
CARHSP1
EMP2
ARHGAP17
GSG1L
CLN3
AC138894.1
RP11-231C14.4
FAM57B
NPIPB13
N4BP1
CES1
KIFC3
ESRP2
RFWD3
TMEM204
CRAMP1
AL031708.1
TRAF7
TBC1D24
SRRM2
NAA60
RMI2
QPRT
SETD1A
LONP2
MMP15
NDRG4
E2F4
NFATC3
TANGO6
CDH13
CPNE7
PITPNA
ATP2A3
SLC25A11
ASGR1
NCOR1
MFAP4
FLOT2
SPOP
FAM20A
NAT9
HID1
JPT1
SLC38A10
SGSM2
MED11
WSCD1
SLC16A13
KDM6B
NLK
NF1
FKBP10
SP2
NGFR
EPN3
DCAF7
CACNG4
COG1
TMEM94
TSEN54
LLGL2
BIRC5
FN3KRP
RPRD1A
KDSR
GREB1L
ONECUT2
SBNO2
ADAMTSL5
MFSD12
MYO1F
MAN2B1
AC010422.3
AC092329.3
C19orf47
DEDD2
PAFAH1B3
ZNF428
SMG9
NAPA
MBOAT7
CHMP2A
ABCA7
NFIC
LRRC8E
PRKCSH
GCDH
COLGALT1
PIK3R2
AC007192.1
GATAD2A
USF2
PSMD8
CYP2S1
HNRNPUL1
CCDC61
ARHGAP35
BICRA
EHD2
PRR12
KMT5C
ZNF587
TMEM18
APOB
CCDC88A
SPRED2
TEX261
FBXO41
MFSD9
TTN
DNPEP
ECEL1
HDLBP
KHK
STEAP3
EPB41L5
R3HDM1
LYPD6B
2019-03-07
CERS6
EFHD1
ASB1
C20orf27
CD93
ZHX3
JPH2
TMEM189
CTSZ
PANK2
HCK
CBFA2T2
TGIF2
YWHAB
ZSWIM1
RAB22A
OGFR
DNAJC5
HSPA13
NRIP1
APP
C2CD2
CHAF1B
COL6A1
CLTCL1
XBP1
MYH9
MKL1
SLC25A17
TCF20
SCO2
SUSD2
MTMR3
SFI1
ISX
POLR2F
ADM2
SUMF1
ZDHHC3
RFT1
VGLL3
PIK3R4
DHX36
APOD
TNK2
RUBCN
MTMR14
TATDN2
AC022384.1
TSEN2
ITGA9
LIMD1
KLHL18
GTF2E1
DIRC2
CHCHD6
PODXL2
SEC61A1
PSMD2
CCDC50
SLC26A1
APBB2
ANKRD17
INTS12
SORBS2
HGFAC
PDGFRA
PARM1
BMP2K
INTU
NOCT
HHIP
FAM160A1
MTMR12
ZFR
ACTBL2
AP3B1
TMEM161B
AFF4
HARS
ADAM19
DUSP1
ANKRD33B
ERAP2
CDC42SE2
PCYOX1L
SMIM3
AC010441.1
NEURL1B
SIMC1
HIST1H2BC
TRIM26
MDC1
ZBTB12
TAPBP
SRPK1
C6orf132
PEX6
BACH2
REV3L
PHF10
PRRC2A
C6orf48
KLC4
INTS1
HOXA7
PURB
TNS3
HGF
C7orf43
TFR2
CTTNBP2
PARP12
ZNF777
TTYH3
ZMIZ2
RHBDD2
TRRAP
CPSF4
MOSPD3
KMT2E
CALD1
DNAJB6
HR
FGFR1
SLC20A2
ZHX1
LYNX1
LYNX1-SLURP2
SORBS3
RHOBTB2
CHMP7
ZBTB10
RNF139
RHPN1
HAUS6
SIGMAR1
TLN1
ALG2
CTNNAL1
SUSD1
FKBP15
SLC2A6
SNAPC4
EDF1
FOCAD
RORB
RGS3
ORM1
ORM2
RABGAP1
STXBP1
SLC25A25
LAMC3
CACFD1
MRPS2
SLC9A7
AMER1
RTL8B
ATP11C
HCFC1
MECP2
TBL1X
ARMCX5
ABCD1
GDI1
PLXNA3

## Sheet: common elements
6 common elements in "PicTar", "TargetScan", "miRDB" and "RNA22":
HDGF
HDLBP
PURB
TGIF2
CPSF4
UBAP2L
